# Supplementary material for: Triggers and Coping Strategies for Fear of Cancer Recurrence in Cancer Survivors: A Qualitative Study
Source: MDPI journal article supplement (doi:10.3390/curroncol29120746), 2022-12-03
Supplement: s1 [file s1]

Supplementals

# Triggers and Coping Strategies for Fear of Cancer Recurrence in Cancer Survivors: A Qualitative Study

Xu Zhang <sup>1</sup>, Di Sun <sup>2</sup>, Zhiwen Wang <sup>1,\*</sup> and Nan Qin <sup>3</sup>.

Table S1. Detailed information for each participant.

| Number | Gender | Age | Employment Status | Monthly Income | Cancer Treatment      | Cancer Type      | Time Since First Diagnosis | FCRI-SF Score |
|--------|--------|-----|-------------------|----------------|-----------------------|------------------|----------------------------|---------------|
| P1     | Male   | 67  | Retirement        | >5000          | Chemotherapy          | Lung             | 3                          | 5             |
| P2     | Female | 62  | Retirement        | <2000          | Chemotherapy+ Surgery | Gynecology       | 6                          | 19            |
| P3     | Female | 72  | Retirement        | 2000~5000      | Chemotherapy+ Surgery | Breast           | 10                         | 8             |
| P4     | Female | 34  | Full-time job     | 2000~5000      | Chemotherapy          | Gynecology       | 1                          | 20            |
| P5     | Male   | 42  | Full-time job     | 2000~5000      | Surgery               | Lung             | 1                          | 17            |
| P6     | Female | 50  | Retirement        | 2000~5000      | Surgery               | Lung             | 2                          | 22            |
| P7     | Female | 53  | Retirement        | <2000          | Chemotherapy+ Surgery | Gastrointestinal | 4                          | 28            |
| P8     | Male   | 48  | Not employed      | <2000          | Chemotherapy+ Surgery | Gastrointestinal | 3                          | 23            |
| P9     | Female | 30  | Full-time job     | >5000          | Surgery               | Breast           | 1                          | 25            |
| P10    | Male   | 60  | Retirement        | 2000~5000      | Surgery               | Gastrointestinal | 5                          | 10            |

FCRI-SF score  $\geq 13$  indicates the presence of fear of cancer recurrence.
